# Supplementary material for: ATP citrate lyase knockdown impacts cancer stem cells in vitro
Source: PubMed Central journal article supplement — Cell Death Dis. 2013 Jun 27;4(6):e696–. doi: 10.1038/cddis.2013.215 (PMC3702307; doi:10.1038/cddis.2013.215), 2013-06-27

Supplemental data Fig. 1

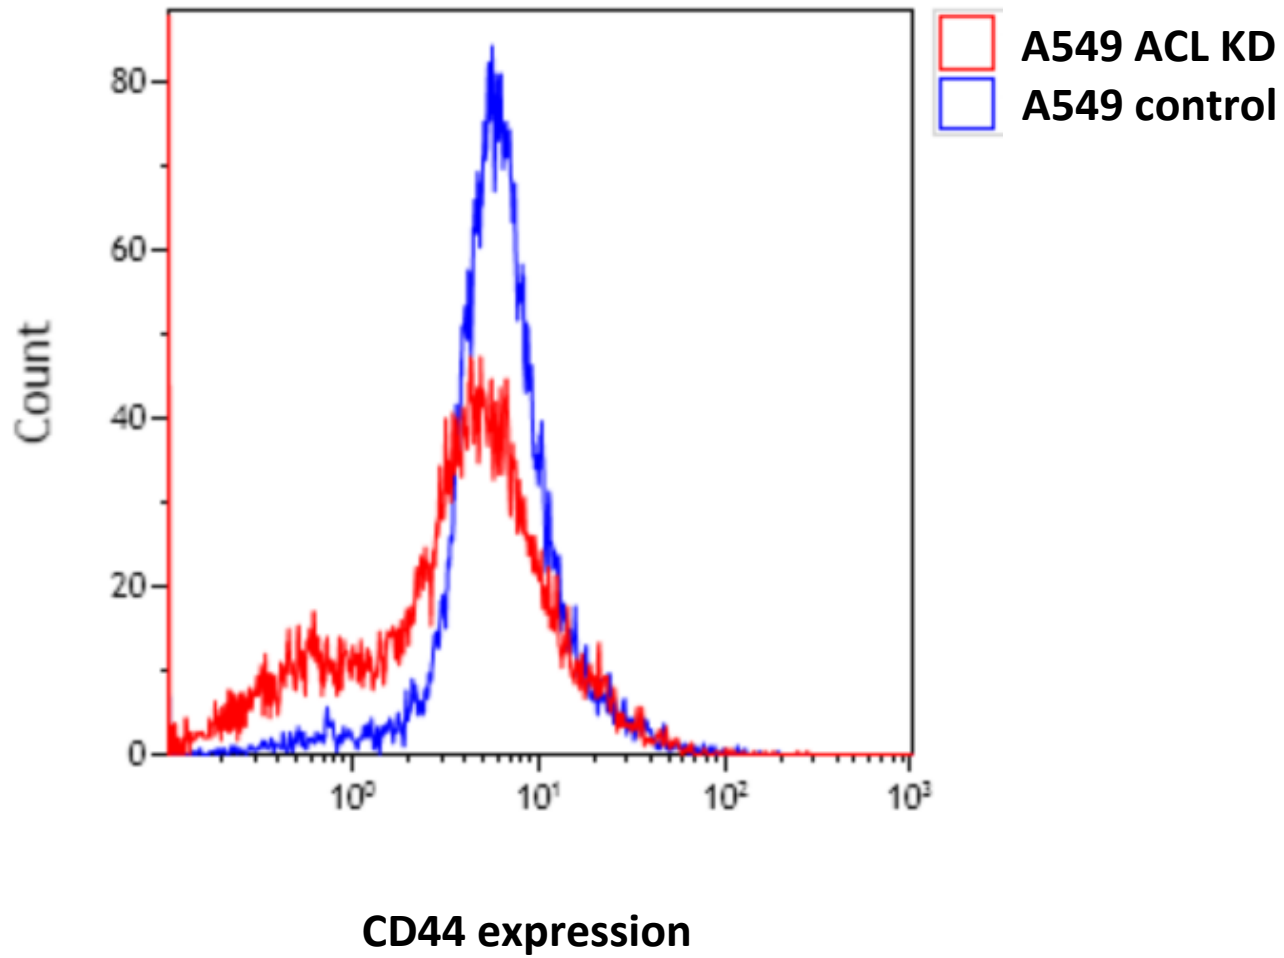

Supplemental data Fig. 2

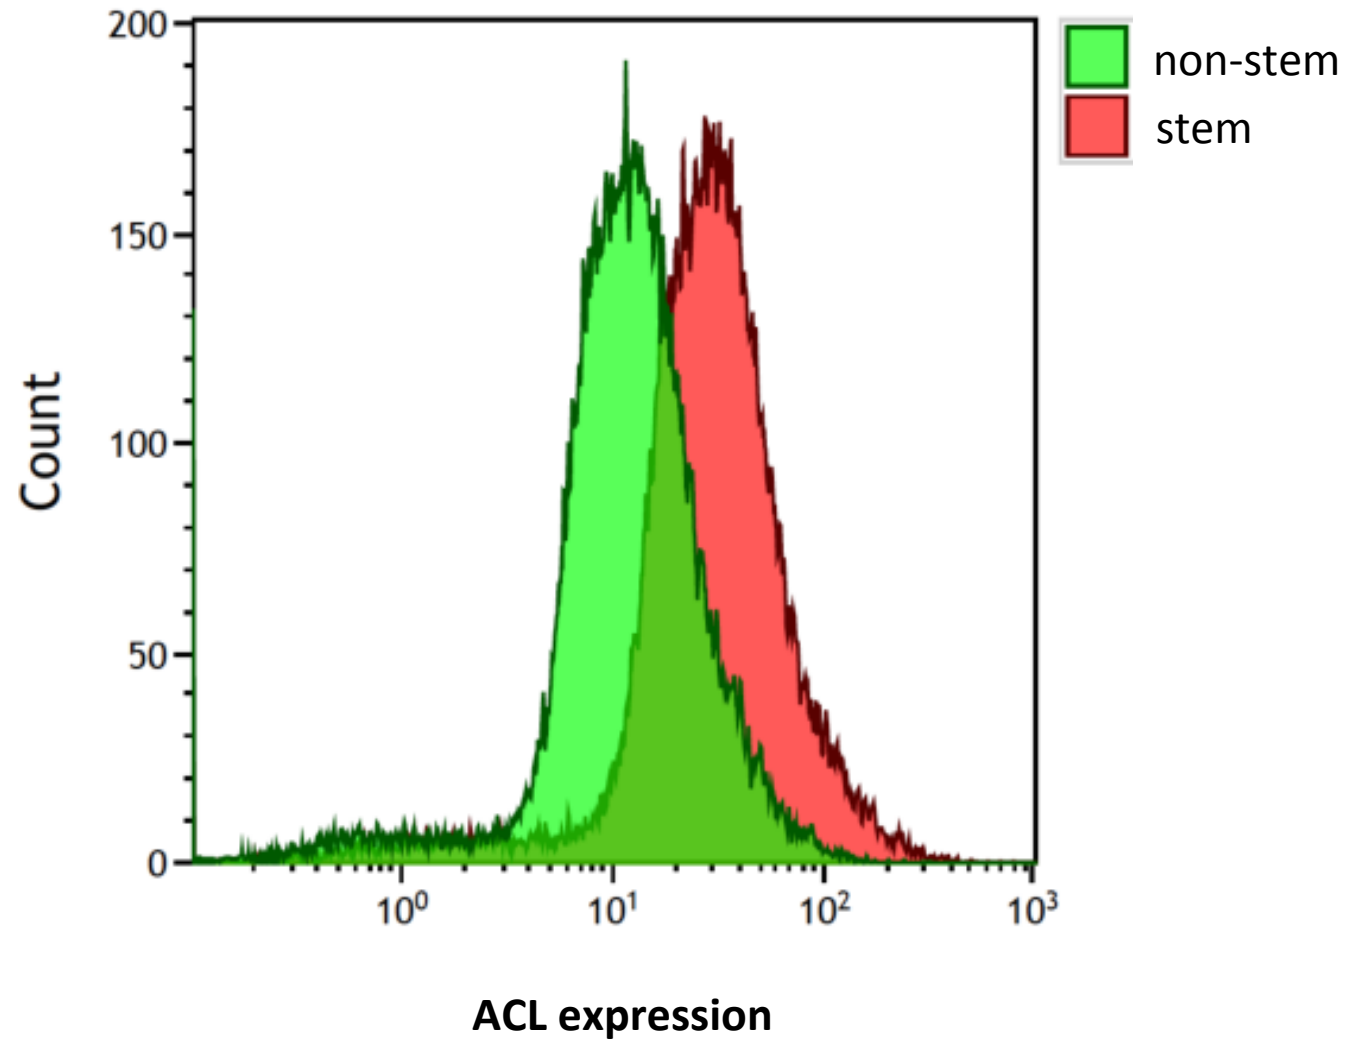

Supplemental Fig. 3

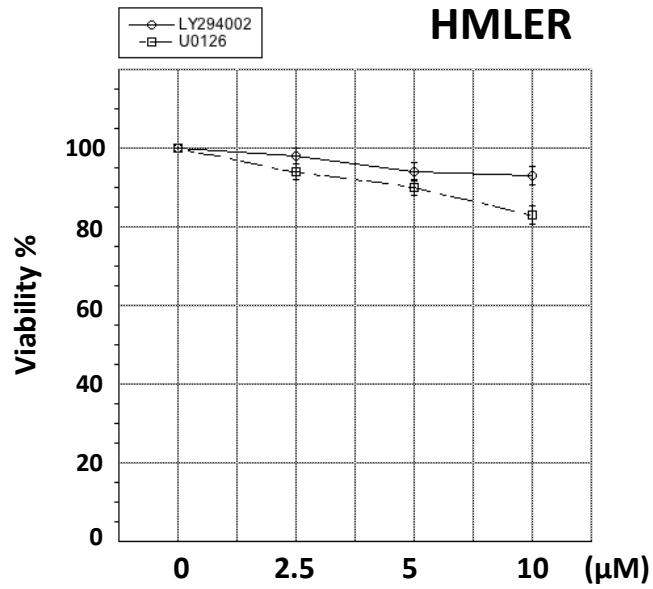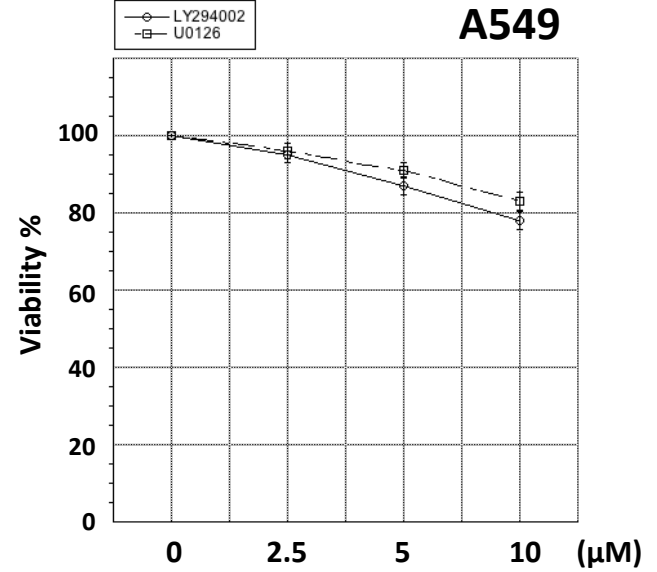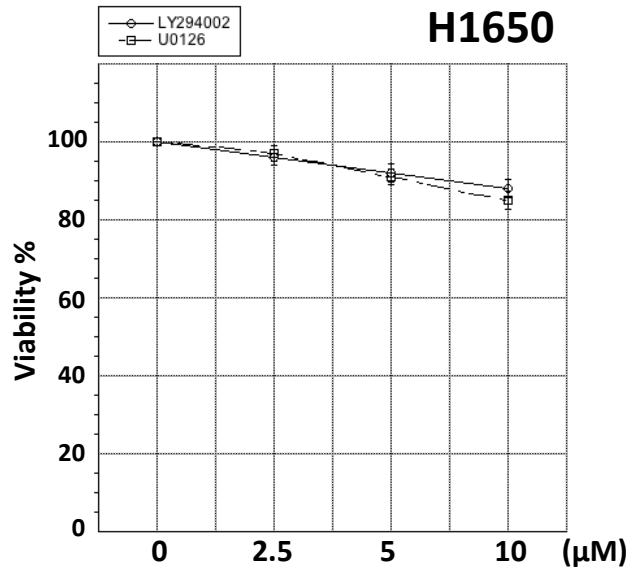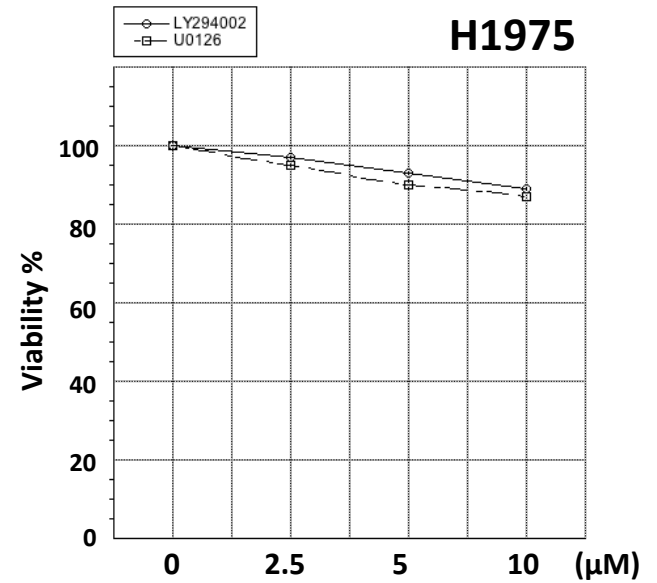

Supplemental data Fig. 4

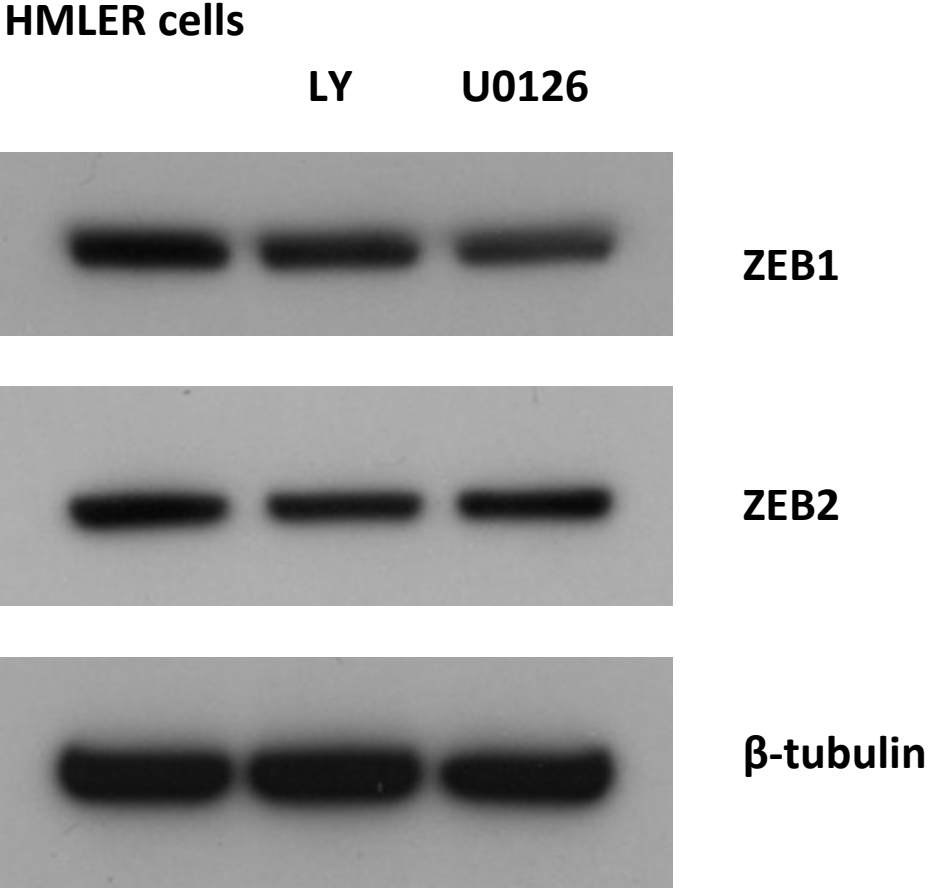

Supplemental Fig. 5

MCF10a GFP cells

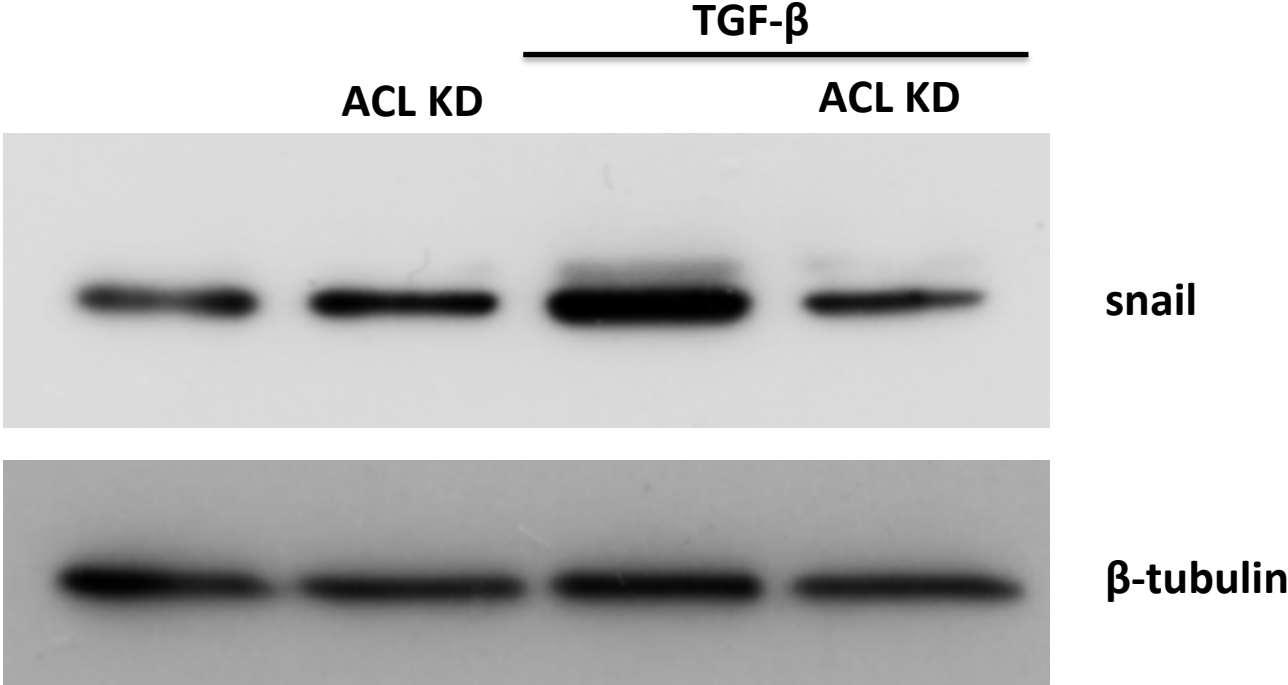

Supplement: cddis2013215x1.pdf [file cddis2013215x1.pdf]
